# Supplementary material for: Effects of clay materials and moisture levels on habitat preference and survivorship of Formosan subterranean termite, Coptotermes formosanus Shiraki (Blattodea: Rhinotermitidae)
Source: PeerJ. 2020 Oct 28;8:e10243. doi: 10.7717/peerj.10243 (PMC7602681; doi:10.7717/peerj.10243)
Supplement: Data S1 [file peerj-08-10243-s001.xlsx]

## Sheet: Sheet1
Choice test
Low-moisture conditions (25% moisture content)	Colony group	Replication	Number of live termites stayed within substrate	Number of live tremites in the bait box							Dry weight of wood block (g)
				unfilled	filled						unfilled		bentonite		kaolin		chorite		attapuigite		illite		soil
					bentonite	kaolin	chlorite	attapulgite	illite	soil	dry(before)	dry(after)	dry(before)	dry(after)	dry(before)	dry(after)	dry(before)	dry(after)	dry(before)	dry(after)	dry(before)	dry(after)	dry(before)	dry(after)
	C1	1	6	0	1	0	0	4	64	0	4.4907	4.2822	4.0318	3.9116	4.6301	4.5283	4.3655	4.2372	3.9285	3.8023	4.4785	4.3374	4.0217	3.9068
		2	13	0	0	1	0	0	61	0	4.2249	4.1173	4.0658	3.8936	4.3686	4.2581	4.093	3.9851	4.3521	4.2185	4.2038	4.0855	4.1256	3.9838
		3	7	0	1	49	1	0	0	1	4.2429	4.1137	4.0684	3.9213	4.1483	4.0492	3.8385	3.727	4.0632	3.9384	5.5231	4.3356	4.2265	4.1092
		4	24	0	2	0	54	0	0	0	4.4365	4.3097	4.2935	4.1673	4.641	4.5244	4.3221	4.0733	4.1824	4.0825	3.7392	3.6292	3.8143	3.6994
	C2	1	82	6	178	2	0	0	3	8	4.5005	4.4004	3.9521	3.8063	4.2419	3.9847	4.0748	3.9637	4.804	4.6676	4.7269	4.5973	4.4128	4.2767
		2	61	5	232	2	5	2	0	9	4.4595	4.2581	4.1106	3.9681	3.9655	3.8528	5.606	3.3856	4.1218	4.0143	3.991	3.8861	3.808	3.6447
		3	83	6	243	1	0	1	0	1	4.5622	4.2882	4.3839	4.2655	4.0576	3.9499	4.2907	4.1828	4.3236	4.1447	4.2737	4.1205	4.8013	4.671
		4	31	1	287	0	0	0	2	9	4.6241	4.4371	4.3909	4.2594	4.0015	3.8788	4.3327	4.1972	3.8701	3.6985	4.6329	4.4479	4.4704	4.3594
	C3	1	159	11	179	0	1	4	1	1	4.2233	3.9782	4.3297	3.7528	4.3206	4.2122	4.5006	4.3746	4.4274	4.2994	4.3928	4.2638	4.0868	3.9642
		2	46	0	263	2	0	0	0	2	4.338	4.1599	3.9842	3.5053	4.4221	3.3134	4.4858	4.3646	4.1398	4.012	4.2231	4.0662	3.7266	3.6071
		3	126	1	240	0	1	0	1	1	4.3375	4.1993	4.1578	3.7224	5.0506	4.925	4.1842	4.004	4.4606	4.3129	4.1803	4.0642	3.8814	3.6454
		4	67	6	276	0	3	4	0	1	3.9088	3.5549	4.0993	3.8406	4.1457	4.0389	4.4042	4.289	4.2159	4.0424	4.5677	4.4498	4.4153	4.2972
Moderate-moisture conditions (50% moisture content)	C1	1	14	0	0	0	0	116	0	0	4.5158	4.3929	4.1016	3.9658	4.5999	4.4824	3.9002	3.66	4.6583	4.4353	4.5095	4.3788	4.5895	4.4035
		2	41	0	69	0	42	105	0	17	4.1395	3.8704	4.2356	4.0282	4.0091	3.9024	4.316	4.1932	4.0175	3.6995	4.037	3.8925	3.9045	3.7846
		3	19	2	53	22	10	117	7	71	4.3366	4.2131	4.4951	4.3091	4.1557	4.0069	4.7644	4.6204	4.2523	4.0069	4.1226	3.9775	4.4776	4.1923
		4	36	1	22	0	87	58	1	34	3.9178	3.8005	4.0602	3.9173	4.0078	3.8831	4.1574	3.9943	3.9252	3.5351	4.1631	4.0073	4.0504	3.832
	C2	1	42	1	3	5	86	163	5	0	4.0792	3.8292	3.8461	3.7069	4.3794	4.1063	3.8906	3.7023	4.3016	4.1425	4.3406	4.2212	4.14	3.9454
		2	2	8	2	0	73	184	0	32	4.0772	3.9094	3.813	3.5737	4.1102	3.965	4.0288	3.821	4.0787	3.9312	3.7793	3.6514	4.0449	3.7525
		3	31	0	32	2	43	160	0	16	4.7786	4.6576	3.9988	3.6513	4.2619	4.1771	4.1307	3.8519	4.6258	3.4599	4.612	4.4731	5.0272	4.8359
		4	34	0	4	2	188	10	0	63	4.2646	4.1522	3.9993	3.7641	4.4569	4.3243	3.8975	3.6331	4.2908	4.1525	3.9945	3.873	4.2995	4.0319
	C3	1	77	0	47	2	96	135	9	0	4.6619	3.3896	4.2468	3.9796	4.2758	4.1541	4.6033	4.4269	4.6142	4.3467	4.8122	4.6736	3.6926	3.5932
		2	139	2	9	0	118	87	8	2	4.7218	4.4441	4.1386	3.6234	4.7762	4.6454	4.3416	4.1238	4.5922	4.3479	3.6443	3.4699	4.2325	4.1176
		3	52	0	45	1	48	117	3	64	4.7807	4.6422	4.7965	4.5361	4.2415	4.1106	4.7062	4.3499	4.9998	4.7882	3.8815	3.7447	3.8818	3.5576
		4	68	0	16	0	173	60	19	0	4.1822	4.0431	3.7661	3.3065	4.4002	4.2597	4.655	4.4655	4.159	3.8489	4.2894	4.1157	4.3001	4.1539
