# Supplementary material for: Effects of clay materials and moisture levels on habitat preference and survivorship of Formosan subterranean termite, Coptotermes formosanus Shiraki (Blattodea: Rhinotermitidae)
Source: PeerJ. 2020 Oct 28;8:e10243. doi: 10.7717/peerj.10243 (PMC7602681; doi:10.7717/peerj.10243)
Supplement: Data S2 [file peerj-08-10243-s002.xlsx]

## Sheet: Sheet1
Choice test
Low-moisture conditions (25% moisture content)	Colony group	Replication	Number of live termites stayed within substrate	Number of live tremites in the bait box							Weight of wood block (g)
				unfilled	filled						unfilled			bentonite			kaolin			chorite			attapuigite			illite			soil
					bentonite	kaolin	chlorite	attapulgite	illite	soil	dry (before)	wet (after)	dry (after)	dry (before)	wet (after)	dry (after)	dry (before)	wet (after)	dry (after)	dry (before)	wet (after)	dry (after)	dry (before)	wet (after)	dry (after)	dry (before)	wet (after)	dry (after)	dry (before)	wet (after)	dry (after)
	C1	1	28	1	44	1	0	4	1	2	3.965	3.6402	2.7794	3.1709	4.0273	2.9894	3.2354	4.0439	3.0958	2.7462	3.5879	2.6805	3.4103	4.2963	3.2741	3.2437	4.1335	3.1402	3.0843	3.9623	2.9971
		2	1	97	0	0	0	0	0	0	3.1035	3.9609	2.9711	3.0395	3.9368	2.853	3.0533	3.9019	2.9567	3.5386	4.5479	3.4424	3.6536	4.5326	3.4988	3.0067	3.8121	2.8983	3.5637	4.5807	3.4853
		3	1	1	106	0	0	0	0	0	2.6909	3.441	2.6472	3.3175	4.2406	3.0943	3.1276	4.0475	3.0803	3.1596	3.9732	3.0233	4.3609	5.5805	4.2579	3.2502	4.2096	3.1873	3.1025	3.8417	2.9514
		4	0	0	0	0	0	0	0	7	3.0511	3.783	2.9087	2.9686	3.9791	2.938	3.0239	3.9452	2.9534	3.8685	4.9685	3.7899	3.2179	4.0983	3.1035	3.1784	4.0805	3.1017	3.0263	3.7766	2.875
	C2	1	36	0	252	0	0	1	0	3	2.7362	3.4308	2.6242	2.6505	3.3184	2.4716	2.9163	3.7227	2.8596	4.9855	6.2924	4.8828	3.0662	3.8222	2.8857	3.0597	3.9754	2.9809	3.8882	4.8781	3.7929
		2	24	0	263	0	0	2	0	5	2.9847	3.694	2.8314	3.2337	4.035	2.9779	3.6968	4.7778	3.5994	3.5354	4.4984	3.4273	2.9344	3.7117	2.8137	2.9909	3.846	2.9162	2.9181	3.6584	2.767
		3	11	2	296	0	1	4	0	0	3.449	4.1517	3.1981	3.541	4.4884	3.3661	3.1807	4.1011	3.1027	2.854	3.6799	2.7914	3.5139	4.3259	3.3721	2.7736	3.5149	2.6826	3.4064	4.33	3.3349
		4	35	1	224	0	0	28	0	31	3.2972	4.0995	3.1599	3.2012	3.9417	2.9758	4.0754	5.1164	3.8828	2.8861	3.5985	2.7543	3.068	3.7785	2.8849	3.0787	3.8927	2.9628	3.1323	3.827	2.9626
	C3	1	23	0	233	0	6	0	1	16	3.0676	3.84	2.9266	3.121	4.4371	2.5941	3.0821	3.9046	3.0034	3.1667	3.981	3.0493	3.642	4.6301	3.5594	3.2324	4.1344	3.1571	3.129	3.8345	2.9457
		2	31	21	253	0	0	14	0	0	3.4948	4.1087	3.1419	3.8634	4.7433	3.5646	3.1292	4.0246	3.0722	3.1796	4.0428	3.0823	3.6051	4.5973	3.5129	3.535	4.4459	3.4315	2.71	3.4137	2.6499
		3	48	22	223	0	0	39	0	21	3.3832	4.1463	3.2131	3.5314	4.3135	3.1944	2.9865	3.8323	2.9072	2.6857	3.4448	2.6077	3.04	3.535	2.6476	3.7324	4.7877	3.6151	3.314	4.0263	3.0701
		4	33	6	237	0	0	0	6	0	3.5	4.3493	3.3477	3.7173	4.388	3.3603	3.3557	4.3338	3.3092	2.7168	3.5132	2.6071	3.1823	4.0371	3.0979	3.458	4.2766	3.2797	2.6337	3.444	2.5668
Moderate-moisture conditions (50% moisture content)	C1	1	42	0	29	5	135	6	7	41	2.4994	3.3029	2.3942	3.2325	4.7302	2.9875	3.431	4.486	3.3399	3.3698	4.4448	3.1115	3.2649	4.5125	3.1524	3.1244	4.2774	2.9866	3.093	3.9897	2.8697
		2	10	0	81	11	36	80	10	70	3.233	4.3187	3.0755	3.0538	7.2777	2.8927	3.9465	4.4898	2.8679	3.2599	5.8275	3.1066	3.0194	5.2278	2.8425	3.5399	5.7252	3.3283	2.9798	4.3785	2.7724
		3	5	0	121	0	3	30	0	24	3.643	4.9149	3.5292	2.8404	5.4921	2.671	2.9652	4.4485	2.8245	3.5316	6.3525	3.3425	4.9351	8.3934	4.7813	3.1536	5.0421	3.0274	3.2054	4.2415	2.928
		4	5	0	35	0	106	137	0	0	3.0195	3.9158	2.9187	3.5519	6.6741	3.4257	2.7543	3.8411	2.6495	3.198	4.7256	3.0194	3.0954	4.2033	2.8116	3.9494	5.8389	3.8455	3.0022	4.0275	2.8399
	C2	1	30	4	0	3	73	46	8	117	3.7713	4.8845	3.6133	2.8509	4.6814	2.7838	2.9982	4.0336	2.8502	3.5786	5.9069	3.4197	3.0447	4.2759	2.8622	3.3669	4.9677	3.1062	3.0779	3.8561	2.7566
		2	22	0	66	6	65	32	13	37	3.4761	4.6241	3.2829	3.2501	4.2623	2.9639	2.5955	3.436	2.4653	3.1928	4.4956	3.0803	3.2376	4.4079	3.0765	3.0712	4.0518	2.9019	3.4365	4.2962	3.1798
		3	28	0	5	0	80	130	2	54	2.3923	3.0437	2.2543	3.8714	6.0292	3.7432	3.9883	5.405	3.8659	3.0571	4.4363	2.9714	2.7719	4.0561	2.5014	3.1921	4.4085	3.0137	4.8819	6.6825	4.5038
		4	20	0	48	4	91	62	25	43	3.1965	4.1292	3.1056	3.6434	5.1499	3.4753	3.5775	4.8977	3.4311	4.0469	5.274	3.8568	3.4874	4.6351	3.2989	3.3636	4.4348	3.1708	2.9559	3.612	2.6585
	C3	1	31	0	83	4	84	18	5	95	3.4845	4.5297	3.3908	2.9956	4.4895	2.8047	2.8566	3.7867	2.7517	3.0616	4.406	2.9126	3.6987	5.1118	3.5107	3.1354	3.8585	2.7537	2.8809	3.6656	2.6602
		2	31	2	35	0	62	10	0	86	3.069	3.9565	2.9088	3.4772	4.8177	3.3192	3.1102	4.166	3.0551	3.7813	4.8989	3.5499	3.5193	4.6866	3.3945	3.8059	5.0029	3.6781	4.0023	5.0899	3.7051
		3	32	0	14	0	139	29	44	90	3.2271	4.3401	3.116	3.4667	7.4339	2.957	3.3009	5.0945	3.1959	3.1319	5.5259	2.9117	3.7097	6.7381	3.4751	2.8434	3.9075	2.5857	3.6105	4.6682	3.2095
		4	27	7	1	7	93	36	8	107	3.2284	4.2384	3.053	2.9305	6.9452	2.8814	3.066	4.2698	2.997	3.215	3.5407	2.9755	2.8941	4.2591	2.7859	3.2506	4.5498	3.058	3.0949	3.8123	2.7359
