# Supplementary material for: Effects of clay materials and moisture levels on habitat preference and survivorship of Formosan subterranean termite, Coptotermes formosanus Shiraki (Blattodea: Rhinotermitidae)
Source: PeerJ. 2020 Oct 28;8:e10243. doi: 10.7717/peerj.10243 (PMC7602681; doi:10.7717/peerj.10243)
Supplement: Data S3 [file peerj-08-10243-s003.xlsx]

## Sheet: Sheet1
No-choice test (Coptotermes formosanus ）
Low-moisture conditions (25% moisture content )	Colony group	Replication	Number of live termites							Fresh weight of live termites (ten)/g1							Dry weight of live termites (g)							Weight of wood block (g)
			unfilled	filled						unfilled	filled						unfilled	filled						unfilled			bentonite			kaolin			chorite			attapuigite			illite			soil
				bentonite	kaolin	chlorite	attapulgite	illite	soil		bentonite	kaolin	chlorite	attapulgite	illite	soil		bentonite	kaolin	chlorite	attapulgite	illite	soil	dry (before)	wet (after)	dry (after)	dry (before)	wet (after)	dry (after)	dry (before)	wet (after)	dry (after)	dry (before)	wet (after)	dry (after)	dry (before)	wet (after)	dry (after)	dry (before)	wet (after)	dry (after)	dry (before)	wet (after)	dry (after)
	C1	1	0	0	0	1	0	1	0	-	-	-	-	-	-	-	-	-	-	-	-	-	-	3.2634	4.2618	3.1836	2.8138	3.789	2.7598	3.1095	4.0669	3.0747	3.5602	4.6346	3.4914	3.1666	4.1781	3.1054	3.2741	4.1974	3.1933	3.0002	3.8528	2.9083
		2	0	0	0	0	0	0	0	-	-	-	-	-	-	-	-	-	-	-	-	-	-	2.9769	3.8771	2.9205	3.1072	4.3062	3.0967	4.1195	5.3149	4.0779	3.5704	4.6603	3.5414	3.0099	4.0235	2.9589	2.8409	3.7249	2.7695	3.3041	4.2767	3.2405
		3	0	0	0	0	20	0	0	-	-	-	-	-	-	-	-	-	-	-	-	-	-	2.9069	3.7145	2.809	3.4347	4.5674	3.343	2.7905	3.6508	2.7741	3.02	3.9628	2.9882	2.91	3.8802	2.82	3.244	4.1725	3.1656	2.8808	3.7072	2.8053
		4	0	0	0	3	0	0	0	-	-	-	-	-	-	-	-	-	-	-	-	-	-	2.5146	3.3474	2.4558	3.2	4.4242	3.1011	3.4821	4.5537	3.4501	3.5428	4.6127	3.4843	3.1563	4.2263	3.0915	2.8848	3.7466	2.8645	3.293	4.2832	3.1979
		5	0	0	0	0	0	0	4	-	-	-	-	-	-	-	-	-	-	-	-	-	-	3.4697	4.4858	3.4146	3.1302	4.2453	3.1096	3.1671	4.1498	3.1509	2.9764	3.926	2.9342	3.5501	4.9539	3.4226	3.3021	4.2875	3.257	2.5302	3.24	2.4507
	C2	1	6	59	83	67	71	59	58	-	0.023	0.019	0.0208	0.0236	0.0192	0.0177	-	0.0071	0.005	0.0054	0.0052	0.0054	0.0062	2.977	3.7916	2.9225	3.7238	4.9672	3.6875	2.6103	3.3934	2.6071	3.4547	4.418	3.3939	3.5001	4.5657	3.4671	3.2651	4.2993	3.2442	3.2951	4.1492	3.2567
		2	65	64	50	61	75	0	53	0.0218	0.0227	0.0204	0.021	0.025	-	0.0217	0.0071	0.0061	0.0059	0.0052	0.0062		0.0062	3.0731	3.8936	3.0165	3.6115	4.7999	3.518	3.6533	4.6716	3.6252	3.0523	4.0315	3.0285	3.1558	4.0407	3.0608	4.4588	4.4953	4.4192	3.2247	4.1637	3.1974
		3	71	47	78	86	65	52	59	0.0193	0.0252	0.0191	0.0213	0.0277	0.0192	0.0209	0.0063	0.0061	0.0053	0.0059	0.0059	0.005	0.0061	3.2624	4.2126	3.2212	2.9464	4.0002	2.9148	3.4709	4.2503	3.4629	3.2966	4.2918	3.2456	3.0045	3.9981	2.9515	3.2773	4.2964	3.263	2.9899	3.8451	2.968
		4	54	67	79	0	91	62	49	0.0199	0.0248	0.0207	-	0.0257	0.0216	0.022	0.0062	0.006	0.0063		0.006	0.0056	0.0066	2.9875	3.7948	2.926	3.162	4.3108	3.1457	2.6954	3.4694	2.6562	3.8769	5.0348	3.7983	3.4988	4.5532	3.3958	3.4028	4.4432	3.3874	3.4487	4.4925	3.4203
		5	42	62	80	83	75	83	75	0.0225	0.024	0.0209	0.0219	0.0205	0.0222	0.0207	0.0071	0.0055	0.0061	0.0056	0.0046	0.0053	0.007	3.3488	4.2748	3.2825	3.2974	4.3999	3.21	2.9409	3.7969	2.8995	3.1601	4.1404	3.1089	3.4703	4.6256	3.4459	3.0337	3.9674	2.9814	3.11	4.0038	3.0765
	C3	1	0	88	76	60	51	72	49	-	0.0286	0.0214	0.0213	0.0256	0.022	0.0245	-	0.0089	0.0054	0.0058	0.0061	0.0059	0.0074	3.4305	4.3724	3.3464	3.6259	4.9181	3.5587	3.3982	4.5441	3.3815	2.7338	3.5995	2.6967	2.9936	3.8587	2.9327	3.2501	4.2097	3.2061	2.7673	3.5785	2.7424
		2	54	64	59	45	55	70	62	0.03	0.0287	0.0198	0.0198	0.0266	0.0216	0.0195	0.0074	0.0074	0.0055	0.0054	0.0066	0.0063	0.0061	4.0947	5.1213	3.9531	3.447	4.5482	3.3412	3.156	4.1671	3.1549	3.0526	4.0235	3.0471	4.4502	5.7033	4.356	3.2472	4.2395	3.1194	3.762	4.7412	3.6744
		3	10	86	66	47	56	69	60	-	0.0306	0.0233	0.0219	0.0224	0.0235	0.0222	-	0.0072	0.0059	0.0059	0.0049	0.0059	0.0061	3.2086	4.0582	3.075	3.2179	4.1942	3.03	3.415	4.4639	3.3857	3.3655	4.4932	3.3264	3.4397	4.4303	3.3657	3.0135	3.9337	2.9841	2.9801	3.865	2.9404
		4	0	57	65	53	76	63	56	-	0.0278	0.0216	0.0207	0.0249	0.0209	0.0225	-	0.0066	0.0057	0.0058	0.0055	0.0064	0.0074	3.1137	3.9472	3.0408	3.1772	4.2961	3.14	3.8881	4.489	3.8364	4.0486	5.338	4.0386	3.3691	4.2934	3.2446	3.3048	4.335	3.2873	2.7595	3.5842	2.7138
		5	0	58	65	52	48	62	0	-	0.0248	0.0249	0.0235	0.024	0.024	-	-	0.0053	0.0065	0.0066	0.0053	0.0061	-	3.1391	3.9586	2.9937	3.4069	4.6519	3.3703	3.4992	4.5918	3.4581	3.6222	4.6385	3.5345	3.7534	4.832	3.6849	3.3986	4.4006	3.3363	2.8379	3.6292	2.7999
Moderate-moisture conditions (50% moisture content)	C1	1	15	0	20	0	16	0	25	-	-	-	-	-	-	0.0245	-	-	-	-	-	-	0.0094	3.3574	4.32	3.2424	4.0571	8.1288	3.9486	3.6077	4.7857	3.5099	3.405	4.7686	3.3787	3.4748	6.251	3.1686	3.1913	4.876	3.0902	2.9779	3.9019	2.865
		2	22	21	0	26	7	0	15	-	-	-	0.0237	-	-	-	-	-	-	0.0082	-	-	-	3.2253	4.2316	3.1123	3.0088	7.5933	2.9165	3.4561	4.6423	3.3775	3.6363	5.1022	3.5245	2.9238	4.5105	2.8564	3.0527	4.2114	2.9481	2.912	3.9165	2.839
		3	0	23	0	41	26	29	0	-	-	-	0.0272	0.0231	-	-	-	-	-	0.0095	0.0096	-	-	3.4648	4.5532	3.3649	3.3092	7.3843	3.2492	3.381	4.4539	3.297	2.9891	4.1784	2.9322	3.5706	4.799	3.4819	4.2421	5.6135	4.122	3.4697	4.5564	3.3632
		4	22	18	27	0	27	37	12	-	0.0308	0.0238	-	0.0251	0.0312	-	-	0.0114	0.0091	-	0.0088	0.0113	-	3.1296	4.1892	3.0507	3.6105	6.2935	3.5478	3.6695	4.8022	3.5689	2.9458	4.5199	2.8962	3.189	4.5215	3.1007	3.291	4.6112	3.1282	3.1116	4.2641	2.9692
		5	14	23	0	0	8	0	32	-	-	-	-	-	-	0.0265	-	-	-	-	-	-	0.0105	3.7351	4.9381	3.6581	3.0785	6.7243	2.9798	3.2519	4.2843	3.1538	3.0594	4.2934	2.9828	4.0047	7.0322	3.9258	3.3066	4.5502	3.2102	3.2276	4.1569	3.0839
	C2	1	97	84	87	80	72	83	74	0.0285	0.028	0.0268	0.0286	0.0274	0.0261	0.025	0.0071	0.0074	0.0065	0.0074	0.0069	0.0062	0.0059	2.7564	4.3115	2.5081	3.389	6.693	3.2578	2.9505	3.7778	2.7905	3.6467	5.6235	3.5314	3.0117	4.3419	2.8895	2.9999	4.0062	2.8771	3.5052	4.733	3.3183
		2	90	75	81	88	83	86	95	0.0271	0.0284	0.0276	0.0239	0.0283	0.0245	0.0277	0.0084	0.0084	0.0071	0.0065	0.0075	0.0065	0.0073	3.577	4.6454	3.4188	3.3291	6.6692	3.1376	3.5242	4.6009	3.4034	3.5008	5.3261	3.4174	3.3276	4.6083	3.2262	3.0169	4.0007	2.8449	3.3451	4.0574	2.9929
		3	89	75	83	86	87	79	80	0.0305	0.0231	0.0237	0.0261	0.0292	0.0263	0.0265	0.0081	0.0081	0.0063	0.0063	0.0078	0.007	0.0071	3.5963	4.4638	3.3763	3.0188	6.4036	2.8867	2.6863	3.401	2.5765	3.1497	5.118	3.037	2.9691	4.0071	2.8254	2.6958	3.7863	2.5288	3.0961	4.039	2.9117
		4	92	65	86	47	83	86	80	0.0274	0.0234	0.0273	0.0234	0.0291	0.0282	0.0286	0.0072	0.0072	0.0081	0.006	0.0068	0.0078	0.008	2.8872	3.6068	2.7129	2.7884	5.0202	2.6594	3.4381	4.4331	3.2725	2.9746	4.5407	2.9385	3.1519	4.8119	2.9914	3.1501	4.2096	3.0022	3.0005	3.9826	2.8098
		5	76	75	95	78	86	89	82	0.0256	0.0251	0.0284	0.0234	0.0274	0.0295	0.0262	0.0075	0.0075	0.007	0.0075	0.0077	0.008	0.0063	3.2062	4.0008	3.0407	3.1252	5.7776	3.0377	3.5186	4.3487	3.2747	3.5483	5.3513	3.4452	2.7083	3.8017	2.5782	3.5353	4.501	3.3059	3.3068	4.0003	3.1206
	C3	1	90	71	78	82	93	91	72	0.0292	0.0279	0.0273	0.0302	0.0269	0.0323	0.0285	0.0071	0.0071	0.0069	0.0064	0.0059	0.0084	0.0077	2.6006	3.0532	2.3411	2.8077	7.0287	2.6633	3.2132	4.002	3.0128	2.9672	4.8913	2.84	3.3189	5.0223	3.1849	3.284	4.3485	3.0303	3.9331	5.1927	3.7147
		2	81	91	86	72	71	93	77	0.0271	0.0305	0.0281	0.029	0.031	0.0329	0.0318	0.0071	0.0078	0.0066	0.0061	0.0071	0.0083	0.0083	3.4892	4.3915	3.2693	3.0545	7.0521	2.9295	2.9922	3.8251	2.778	3.3062	5.1816	3.2658	3.0004	4.8516	2.8007	2.6621	3.3192	2.4097	2.7499	3.4624	2.5497
		3	80	55	94	69	93	76	71	0.0294	0.0237	0.0273	0.0258	0.0272	0.0298	0.0306	0.0075	0.0056	0.0065	0.0066	0.0079	0.0084	0.0077	3.1168	3.7798	2.8767	3.5384	7.7376	3.4498	3.8864	4.8982	3.6627	3.1059	5.2978	3.0115	3.0904	4.7012	2.874	3.9929	5.169	3.774	3.2218	4.1059	3.0195
		4	79	87	81	80	94	82	76	0.0279	0.0271	0.0281	0.0265	0.0285	0.0289	0.0256	0.0071	0.0072	0.0071	0.0064	0.0075	0.0074	0.0073	3.0412	3.666	2.7653	2.9319	6.7243	2.7937	3.2005	4.1068	3.0574	3.5279	5.7767	3.4602	2.9824	4.0918	2.8392	3.1847	4.2389	3.0394	3.3451	4.3863	3.1572
		5	70	83	86	75	89	87	86	0.0331	0.0267	0.0257	0.0259	0.0277	0.0282	0.0323	0.0091	0.0062	0.0067	0.0061	0.0071	0.0073	0.0084	3.1212	3.9376	2.8821	3.5624	7.3138	3.394	3.0898	3.9826	2.9193	4.0964	6.1363	3.9829	3.725	5.6185	3.5604	3.3227	4.7722	3.1497	2.9474	3.7169	2.7204
note: "-" indicate < 10 worker termites survived.
